# Supplementary material for: Type I and type III interferon receptor knockout chickens: Novel models for unraveling interferon dynamics in influenza infection
Source: eLife journal article supplement (doi:10.7554/elife.107855), 2025-09-10
Supplement: fig1-data1 [file Figure_1d_labelled_uncropped_gel.pdf › Figure_1_source_data_1/Figure_1d_labelled_uncropped_gel.pdf]

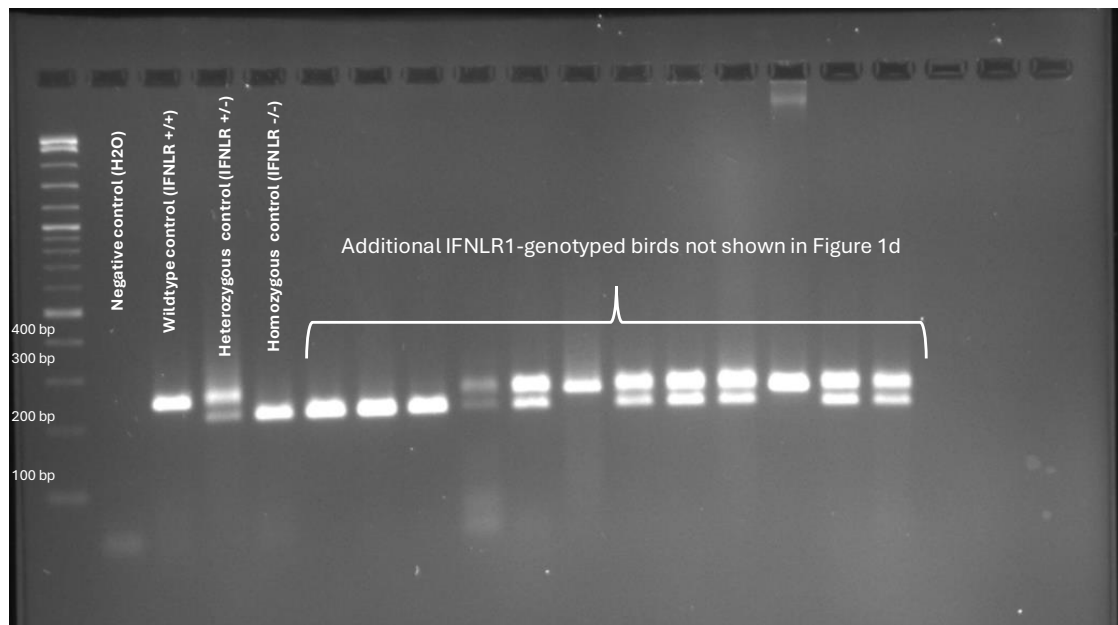

**Figure 1-source data 1.** Labelled uncropped gel image for the IFNL1 PCR genotyping assay shown in Figure 1d. The gel shows the negative control (H<sub>2</sub>O), wildtype control (IFNL1<sup>+/+</sup>), heterozygous control (IFNL1<sup>+/-</sup>), and homozygous knockout control (IFNL1<sup>-/-</sup>). The expected bands are approximately 250 bp for the wildtype allele and 222 bp for the IFNL1 knockout allele. Additional IFNL1-genotyped birds not displayed in the main figure are also included in the uncropped gel.
