# Supplementary material for: Type I and type III interferon receptor knockout chickens: Novel models for unraveling interferon dynamics in influenza infection
Source: eLife journal article supplement (doi:10.7554/elife.107855), 2025-09-10
Supplement: fig2-data1 [file Figure 2b_Mx western blot and β-actin western blot.pdf › Figure_2_source_data_1/Figure 2b_Mx western blot and β-actin western blot.pdf]

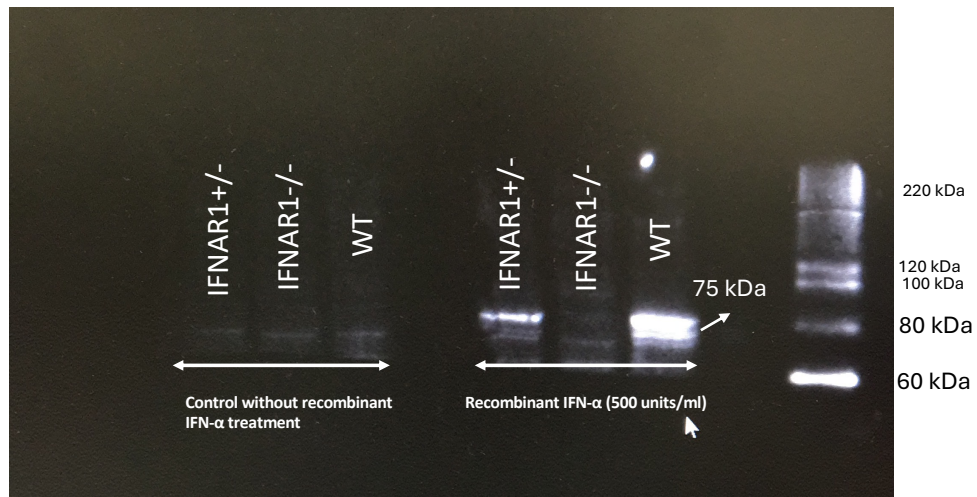

**Figure 2-source data 1, Figure 2b, Mx.** Labelled uncropped western blot showing Mx protein expression in WT, IFNAR1<sup>+/-</sup>, and IFNAR1<sup>-/-</sup> chicken embryonic fibroblast cells with or without recombinant IFN-α treatment.

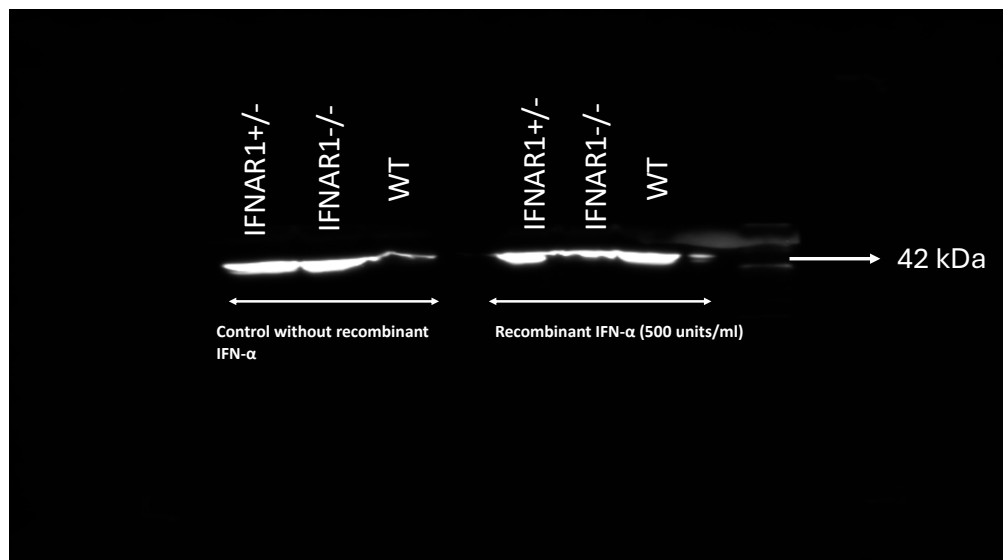

**Figure 2-source data 1, Figure 2b, β-actin.** Labelled uncropped western blot showing β-actin as loading control for the Mx western blot analysis in Figure 2b.
