# Supplementary material for: Type I and type III interferon receptor knockout chickens: Novel models for unraveling interferon dynamics in influenza infection
Source: eLife journal article supplement (doi:10.7554/elife.107855), 2025-09-10
Supplement: fig2-data1 [file Figure 2d_ IL-28Rα RT-PCR gel and β-actin RT-PCR gel.pdf › Figure_2_source_data_1/Figure 2d_ IL-28Rα RT-PCR gel and β-actin RT-PCR gel.pdf]

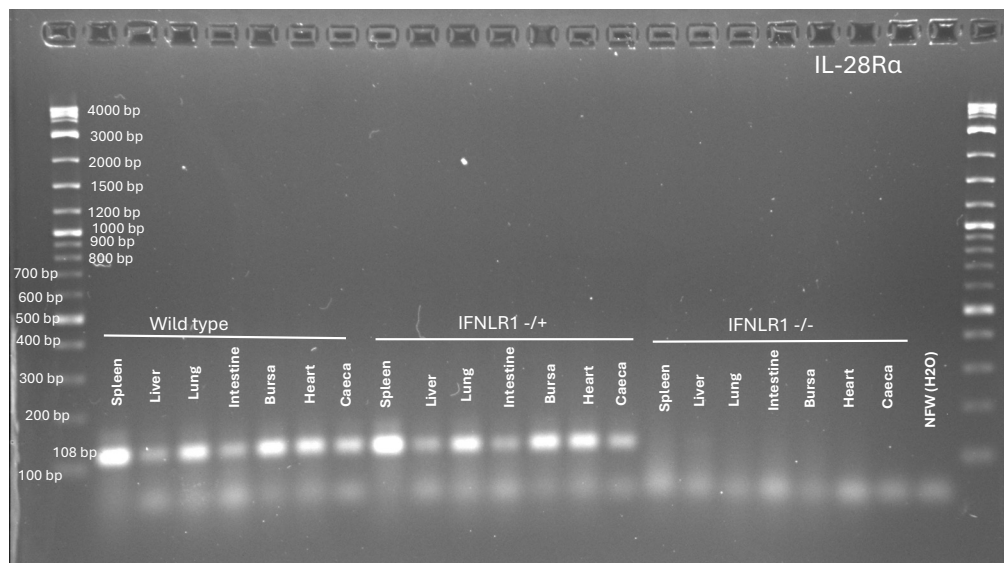

**Figure 2-source data 1, Figure 2d, IL-28Rα.** Labelled uncropped RT-PCR gel showing IL-28Rα amplification in tissues from WT, IFNLR1<sup>+/-</sup>, and IFNLR1<sup>-/-</sup> embryos.

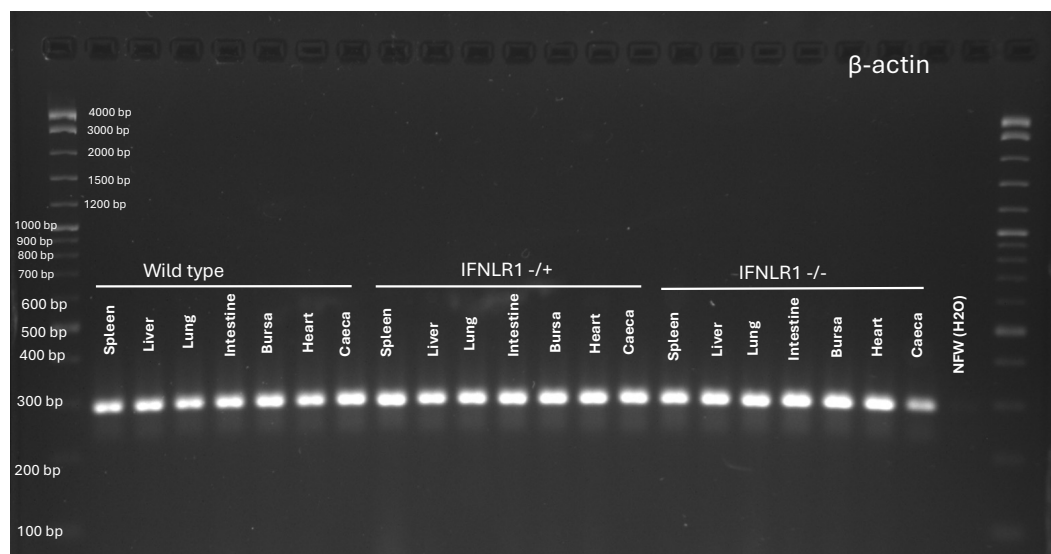

**Figure 2-source data 1, Figure 2d, β-actin.** Labelled uncropped RT-PCR gel showing β-actin amplification as internal control for the IL-28Rα RT-PCR analysis in Figure 2d.
